# Supplementary figures and images for: A phase II, multicenter, open-label, randomized trial of pegfilgrastim for patients with alcohol-associated hepatitis
Source: PubMed Central journal article supplement — eClinicalMedicine. 2022 Oct 12;54:101689. doi: 10.1016/j.eclinm.2022.101689 (PMC9576807; doi:10.1016/j.eclinm.2022.101689), 2022-10-12

Supplemental Figure 1

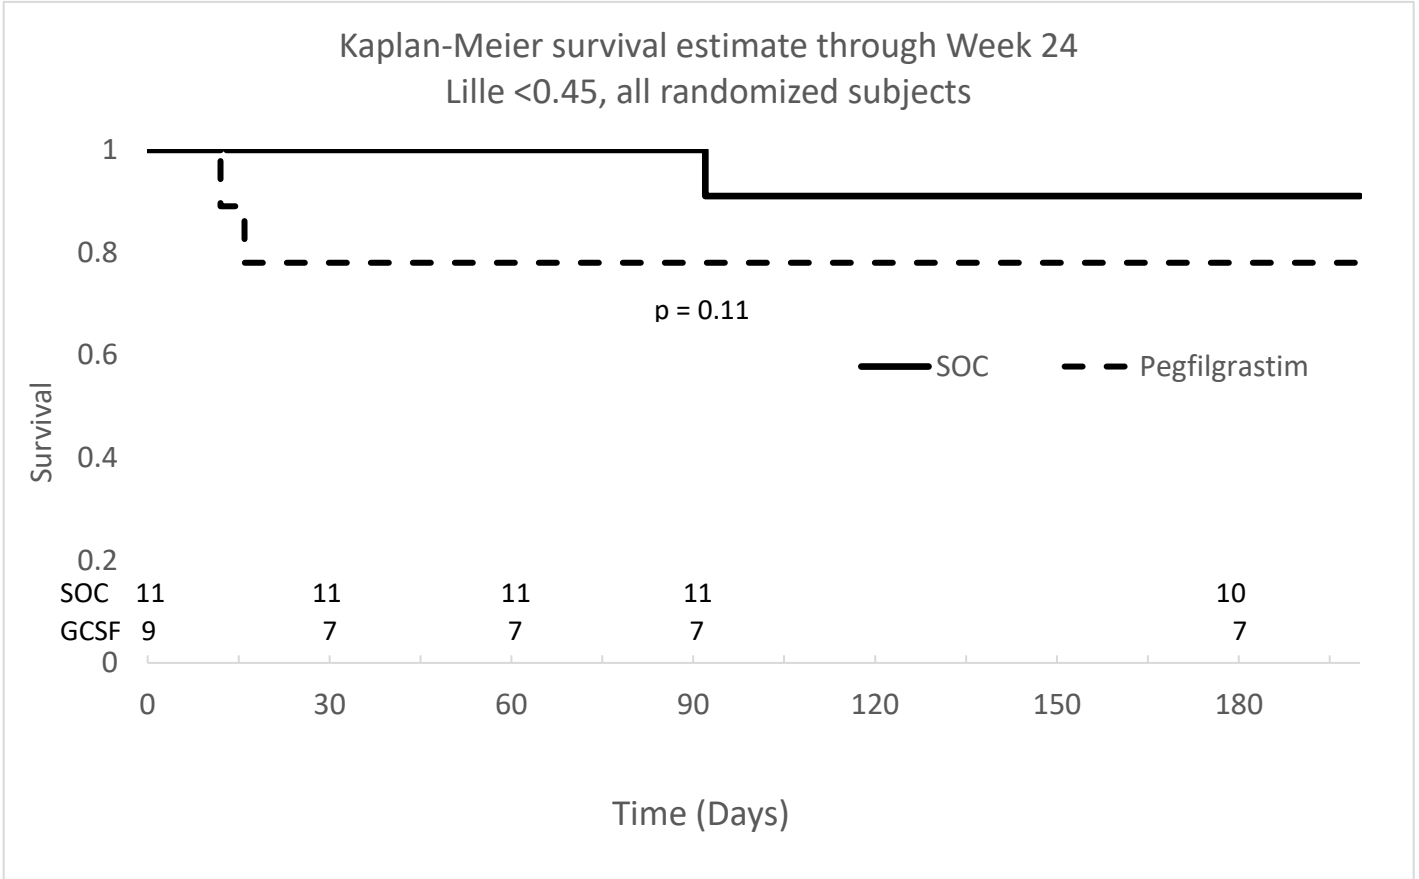

Supplement: mmc1.pdf [file mmc1.pdf]

Supplemental Figure 2

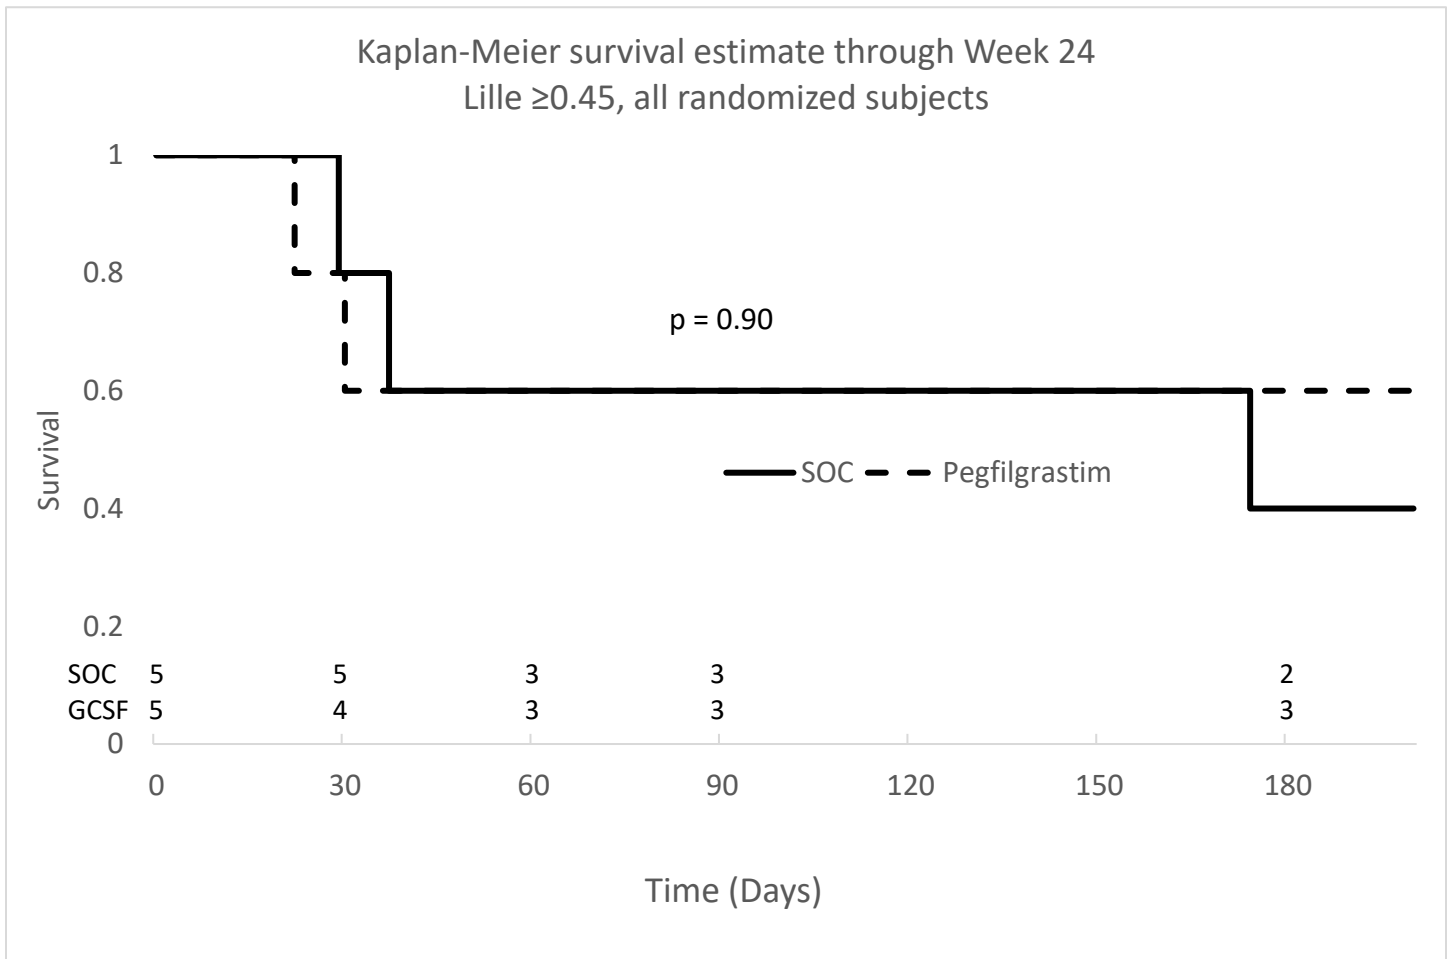

Supplement: mmc2.pdf [file mmc2.pdf]

Supplemental Figure 3

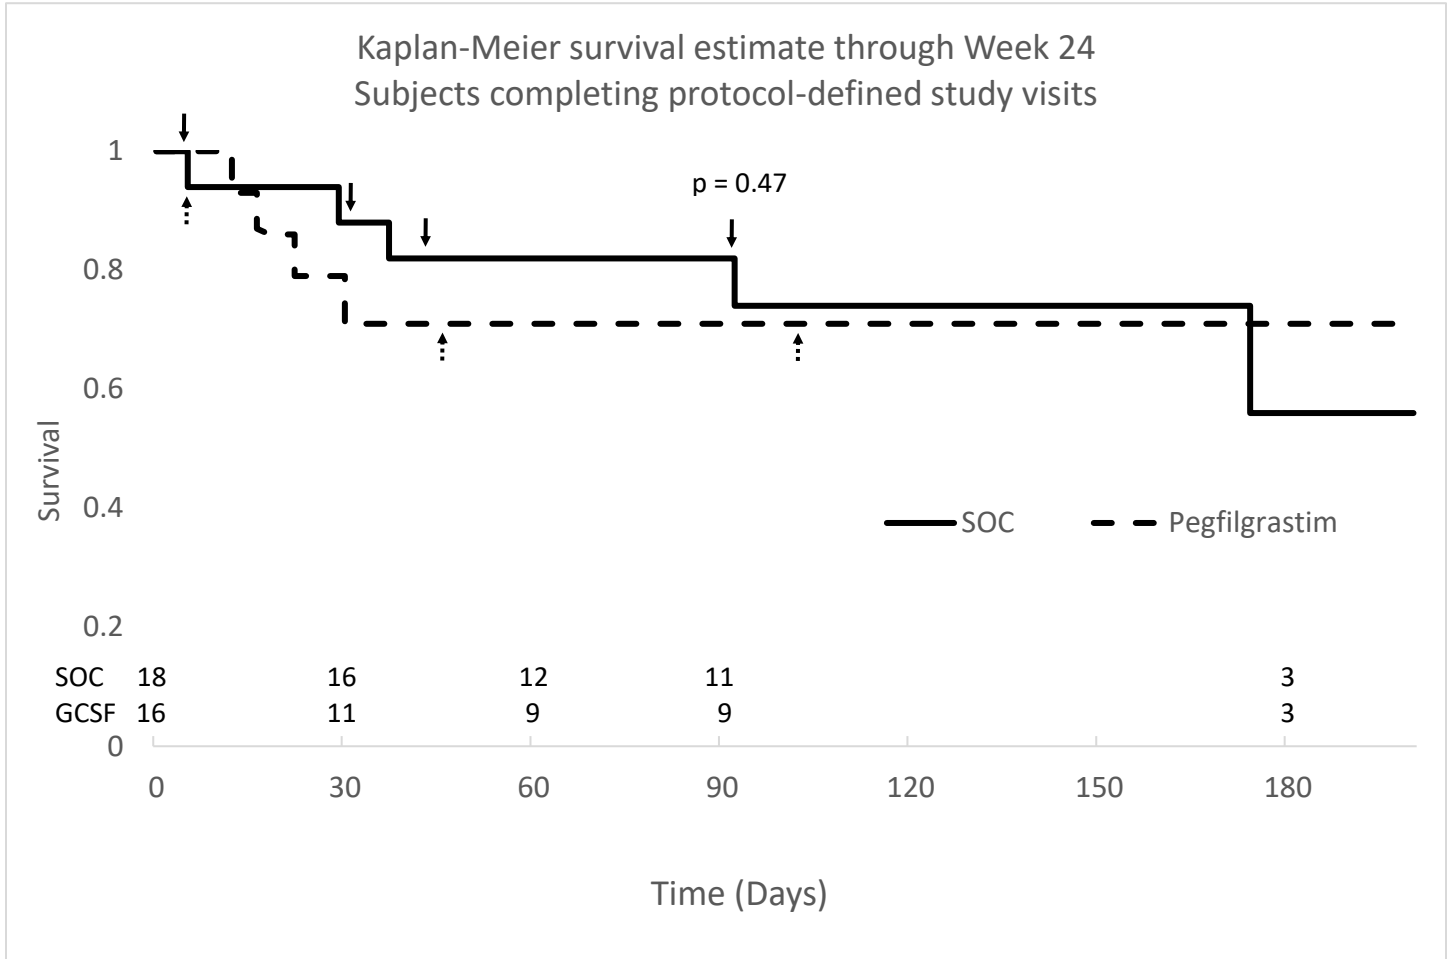

Supplement: mmc3.pdf [file mmc3.pdf]
